# Supplementary material
Source: publisher figshare collection journal article supplement (https://frontiersin.figshare.com/ndownloader/files/13354898)
Supplement: Supplementary file [file 13354898]

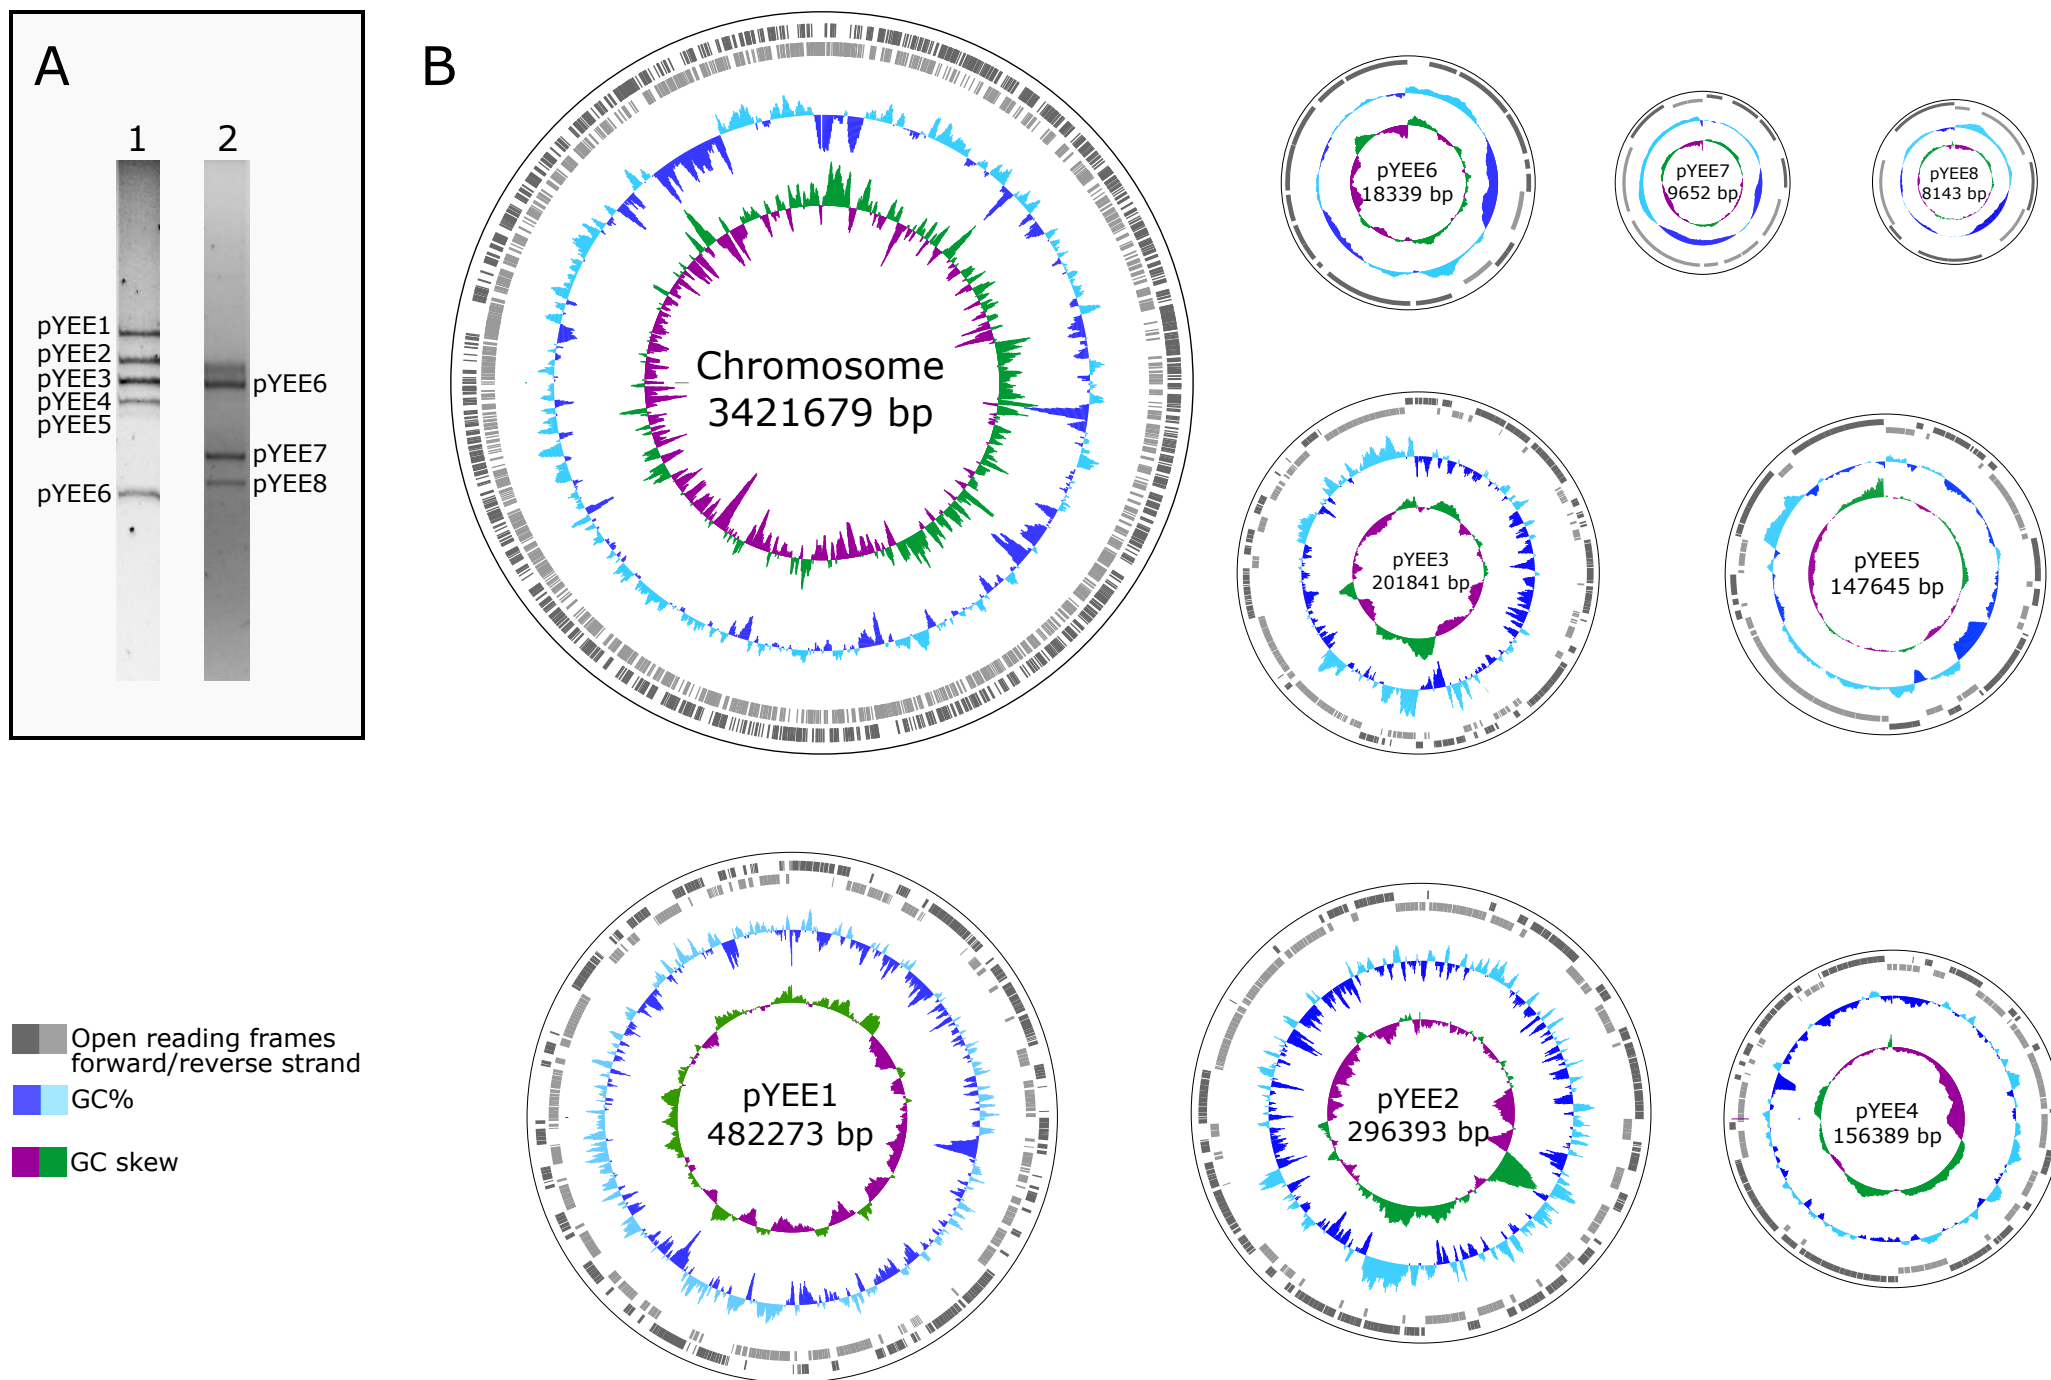

FigS1

Extrachromosomal replicons of *P. yeii* CCUG 32053 visualized by electrophoretic methods (A) and circular representations of the *P. yeii* CCUG 32053 genome (B).

Circles display (from the outside): (i) predicted CDSs transcribed in the clockwise direction, (ii) predicted CDSs transcribed in the counterclockwise direction, (iii) the GC percent deviation, (iv) GC skew (G-C/G+C). Circles are drawn not in scale. Generated using DNAPlotter.
